# Supplementary material
Source: Springer Nature journal article supplement (https://www.springermedizin.de/resource/supplementary/12885_2008_1225_MOESM1_ESM.pdf/9471462)

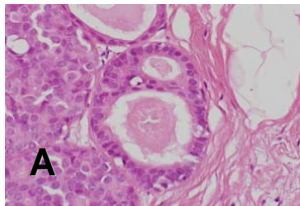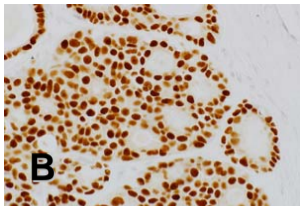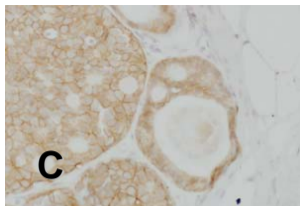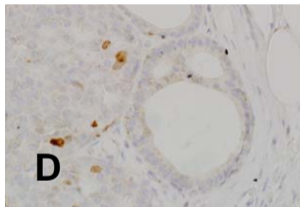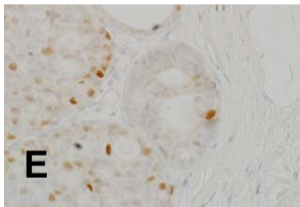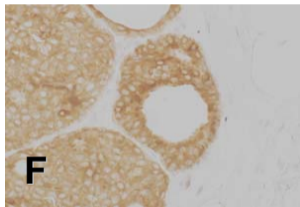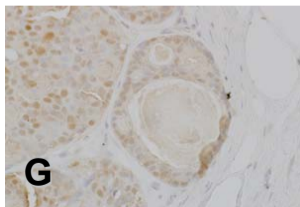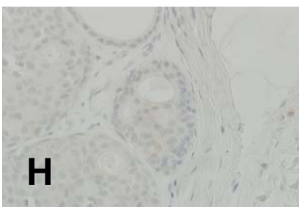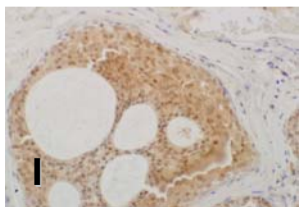

Supplement: MOESM1 [file 9471462]
